# Supplementary material for: Topochemically synthesized Nb3VS6 as a stable anode for sodium-ion batteries
Source: Royal Society of Chemistry journal article supplement (doi:10.1039/d4cc02630f), 2024-01-01
Supplement: d4cc02630f1.pdf [file d4cc02630f1.pdf]

## Supporting Information

### Topochemically synthesized $\text{Nb}_3\text{VS}_6$ as a stable anode for sodium-ion batteries

Harshit Pandey,<sup>a</sup> Pallelappa Chithaiah,<sup>b</sup> Savithri Vishwanathan,<sup>a</sup> H. S. S. Ramakrishna Matte<sup>\*a</sup> and C. N. R. Rao<sup>\*b</sup>

- a. Energy Materials Laboratory, Centre for Nano and Soft Matter Sciences, Bangalore 562162, India.
- b. New Chemistry Unit, International Centre for Materials Science and School of Advanced Materials, Jawaharlal Nehru Centre for Advanced Scientific Research, Jakkur PO, Bangalore-560064, India.

\*Email: [matte@cens.res.in](mailto:matte@cens.res.in) and [cnrrao@jncasr.ac.in](mailto:cnrrao@jncasr.ac.in)

## Experimental

### Synthesis of Nb-HDA complex

Niobium (V) ethoxide (99.95%, Sigma Aldrich), vanadium pentoxide, hydrogen peroxide (30% H<sub>2</sub>O<sub>2</sub>), and 1-hexadecylamine (C<sub>16</sub>H<sub>33</sub>NH<sub>2</sub>, HDA) were utilized to synthesize the Nb-V-HDA complex. 0.5 ml of niobium (V) ethoxide was dispersed in a 25 ml solution of H<sub>2</sub>O<sub>2</sub>, followed by the addition of 0.27 g of V<sub>2</sub>O<sub>5</sub>, resulting in a brown solution. This mixture was then heated to 70<sup>0</sup> C after which a solution of 1.9 g of HDA in 5 ml of ethanol was added. This process led to the spontaneous formation of a Nb-V-HDA complex foam, with heat evolution. The resulting ultra-light foam was collected by filtration, washed with acetone, and dried at room temperature.

### Synthesis of Nb<sub>3</sub>VS<sub>6</sub> nanosheets

Nb<sub>3</sub>VS<sub>6</sub> nanosheets were synthesized from the Nb-V-HDA complex using a horizontal tubular furnace at a temperature of 950<sup>0</sup> C. The reaction process involved a mixture of gases- N<sub>2</sub> (a carrier gas) and H<sub>2</sub>S (a reactive gas). First, the Nb-V-HDA complex was taken in a quartz boat and placed at the entrance of the quartz tube, away from the hot zone of the furnace. The temperature of the furnace was then slowly increased to 950<sup>0</sup> C under a continuous flow of N<sub>2</sub> gas with a flow rate of 95 cm<sup>3</sup> min<sup>-1</sup> to achieve an oxygen-free atmosphere. Once the furnace temperature was stabilized, the quartz boat containing the Nb-V-HDA complex was carefully pushed into the reaction hot zone of the furnace. The flow rates of N<sub>2</sub> and H<sub>2</sub>S gases were set to 65 and 35 cm<sup>3</sup> min<sup>-1</sup>, respectively. The reaction was allowed to proceed for 45 minutes. After 45 minutes, the boat was removed from the hot zone and placed in the cooler part of the quartz tube. The flow rates of N<sub>2</sub> and H<sub>2</sub>S gases were then changed to 85 and 10 cm<sup>3</sup> min<sup>-1</sup>, respectively, for 30 minutes. Finally, to complete the reaction, the furnace was gradually cooled down to room temperature under N<sub>2</sub> flow.

### Characterization

The X-ray diffraction pattern (XRD) was acquired using Rigaku SmartLab and PANalytical X-pert PRO X-ray diffractometers (Cu K $\alpha$  source ( $\lambda = 0.154178$  nm)). X-ray photoelectron spectra (XPS) measurements were carried out using an Omicron nanotechnology spectrometer with Mg K $\alpha$  as the X-ray source. Field emission scanning electron microscopy (FESEM) was carried out using Tescan and Bruker MIRA 3. The transmission electron microscope (TEM) images were

obtained using TALOS F200S G2. Brunauer–Emmett–Teller (BET) measurements were carried out using a Belsorp-Max II instrument and N<sub>2</sub> as the adsorptive gas.

### **Electrochemical measurements**

2032-type coin cells were fabricated in an Ar-filled glovebox with Nb<sub>3</sub>VS<sub>6</sub> as working electrode, Na metal as counter electrode using glass fibre separator. A slurry was prepared by grinding Nb<sub>3</sub>VS<sub>6</sub>, conducting carbon and sodium polyacrylate (PAA) binder in 70:15:15 ratio in deionized (DI) water for 30 min. Blade-coating technique is employed to fabricate thin film of 30 μm thickness on a carbon coated Al (Al-C) foil, followed by drying in a vacuum oven at 110 °C for 24 h. 1 M NaClO<sub>4</sub> in ethylene carbonate (EC) and propylene carbonate (PC) mixed solvent in the ratio (1:1 vol%) was used as the electrolyte. Neware BTS-4000 battery tester was employed to perform the GCD experiments at different current densities in the voltage range 0.01-2.5 V (vs. Na/Na<sup>+</sup>). Metrohm Autolab PGSTAT302N electrochemical workstation was used to carry out EIS and CV measurements. The values of specific capacities and current densities have been determined considering the mass of the active material.

### **Electrokinetic analysis of Na-ion storage**

The functional relation defining the capacitive and diffusive components of the observed current with respect to scan rate is given as:

$$i = k_1 v + k_2 v^{1/2} \quad (1)$$

Where  $v$  is the scan rate ( $V s^{-1}$ ),  $i$  is the current (A), and  $k_1$  and  $k_2$  are the constants. The capacitive contribution to the total current is evaluated from  $k_1 v$ , while the diffusion-controlled current is derived from  $k_2 v^{1/2}$ .

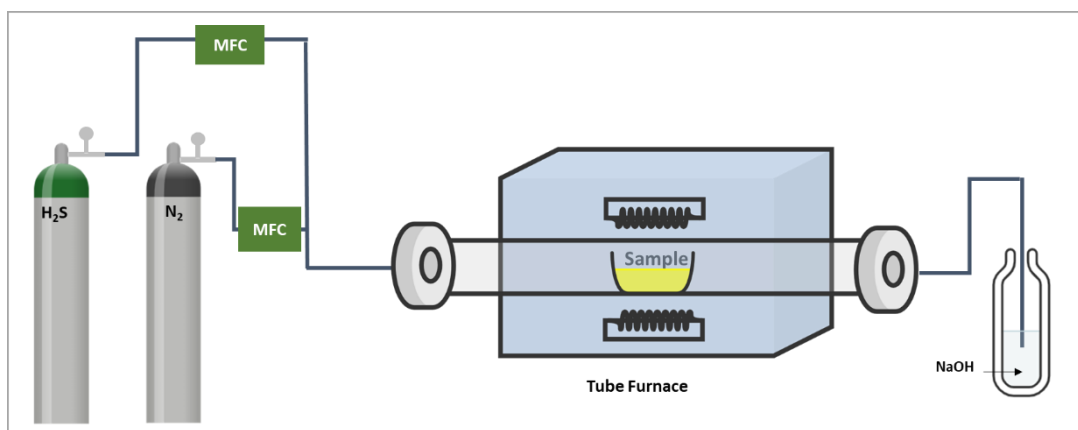

Figure S1 Schematic diagram for synthesis of  $Nb_3VS_6$

### Formation mechanism of $Nb_3VS_6$

In the formation process, the dissolution of niobium ethoxide and vanadium pentoxide in hydrogen peroxide leads to the formation of a brown solution of peroxoniobic and peroxovanadic acids. The addition of HDA solution into the acid solution led to the generation of a yellow-coloured Nb-V-HDA foam. The condensation of peroxoniobic and peroxovanadic acids and the intercalation of HDA occur simultaneously because of the interaction between negatively charged  $NbVO_5$  layers and protonated HDA molecules, leading to the formation of 2D  $NbVO_5$ -HDA (Nb-V-HDA) nanosheets. A similar mechanism was observed for the formation of  $MoO_3$  and  $Nb_2O_5$ .<sup>1,2</sup> The structure and the arrangement of the HDA molecules in the Nb-V-HDA complex were determined by X-ray diffraction (Figure S2a). The diffraction peaks at lower angles ( $5-10^\circ$ ) Fig S2(a) indicate the inorganic/organic hybrids of Nb-V-HDA lamellar mesostructures of  $NbVO_5$ . The XRD pattern shows a diffraction peak at  $2\theta \sim 21.8^\circ$  which corresponds to the (111) planes of the orthorhombic  $NbVO_5$  phase (JCPDF No. 00-046-0046).<sup>3,4</sup> It is believed that HDA molecules were intercalated between the  $NbVO_5$  crystallites. On subsequent calcination of the Nb-V-HDA complex at high temperature in an inert atmosphere, with  $H_2S$  a reactive gas, a sulfurization reaction occurs leading to the formation of pure  $Nb_3VS_6$  nanosheets.

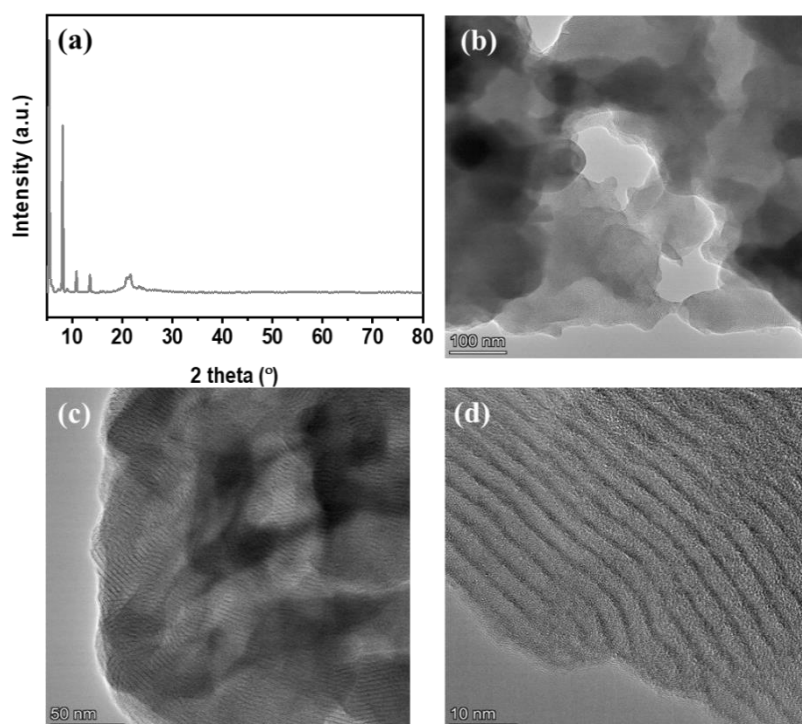

Figure S2 (a) XRD pattern of Nb-V-HDA complex, (b), (c) and (d) TEM images obtained for Nb-V-HDA complex having layered morphology.

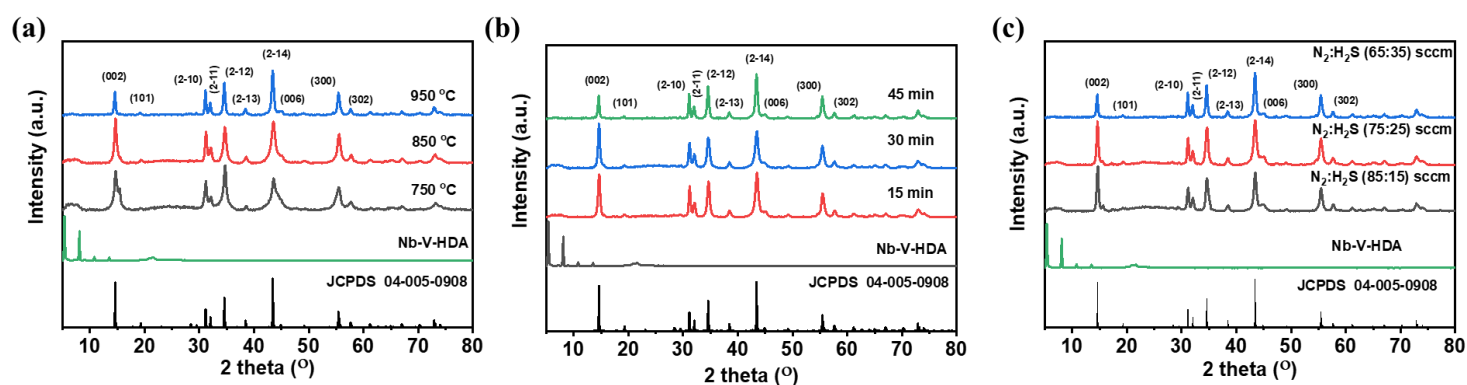

Figure S3 (a) XRD pattern of Nb-V-HDA complex and  $Nb_3VS_6$  under different conditions by varying temperature ( $750^\circ$ ,  $850^\circ$  and  $950^\circ$  C) for 45 minutes at a  $H_2S$  flow rate of 35 sccm (b) by varying time (15, 30 and 45 min) at  $950^\circ$  C at a  $H_2S$  flow rate of 35 sccm and (c) by varying  $H_2S$  flow rates (15, 25 and 35 sccm) at  $950^\circ$  C for 45 minutes.

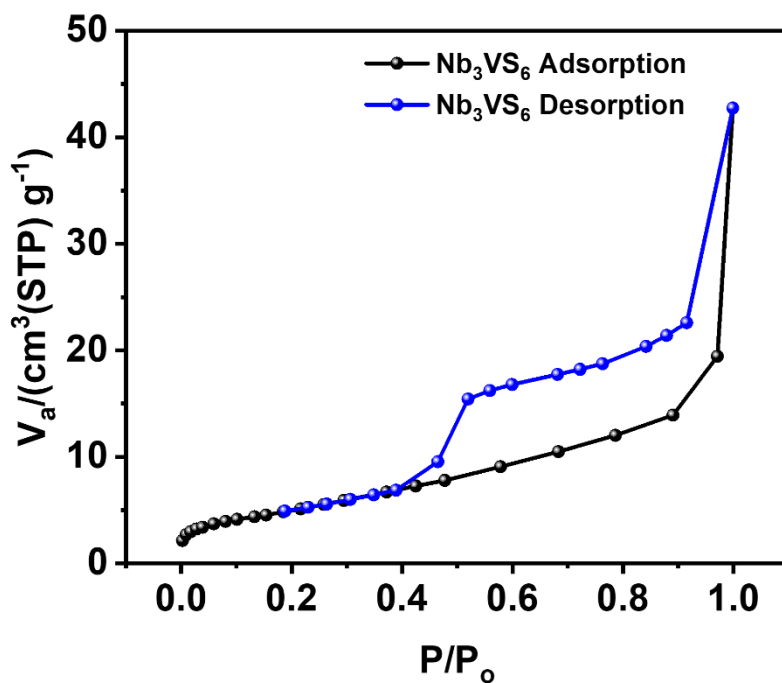

Figure. S4 Adsorption-desorption isotherm of Nb<sub>3</sub>VS<sub>6</sub>.

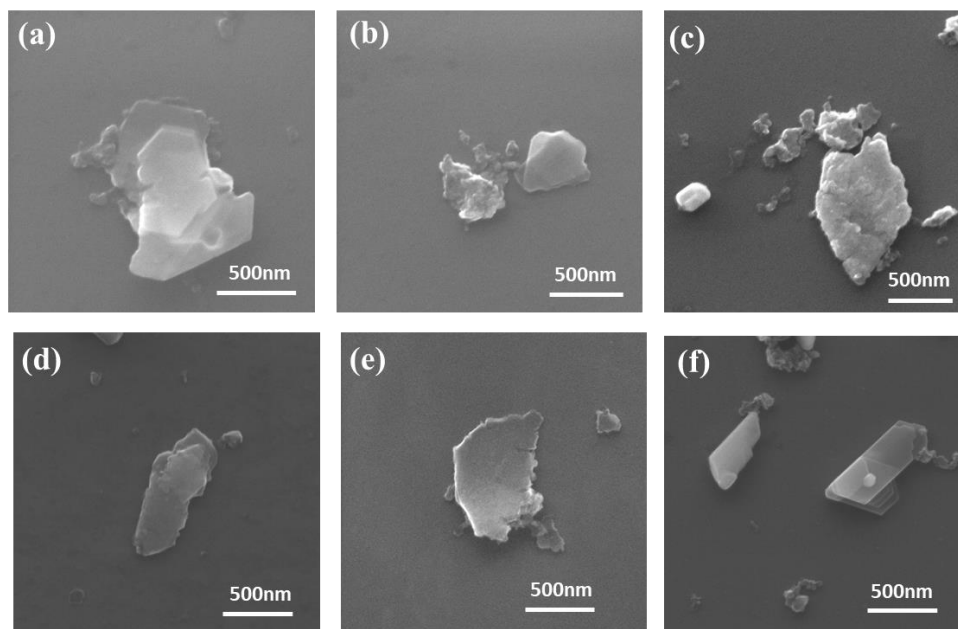

Figure S5. FESEM images of (a,b) Nb<sub>3</sub>VS<sub>6</sub> at 750 and 850<sup>o</sup> C respectively, (c,d) Nb<sub>3</sub>VS<sub>6</sub> at 15 and 30 min respectively, and (e,f) Nb<sub>3</sub>VS<sub>6</sub> at 15 and 25 sccm flow rates respectively.

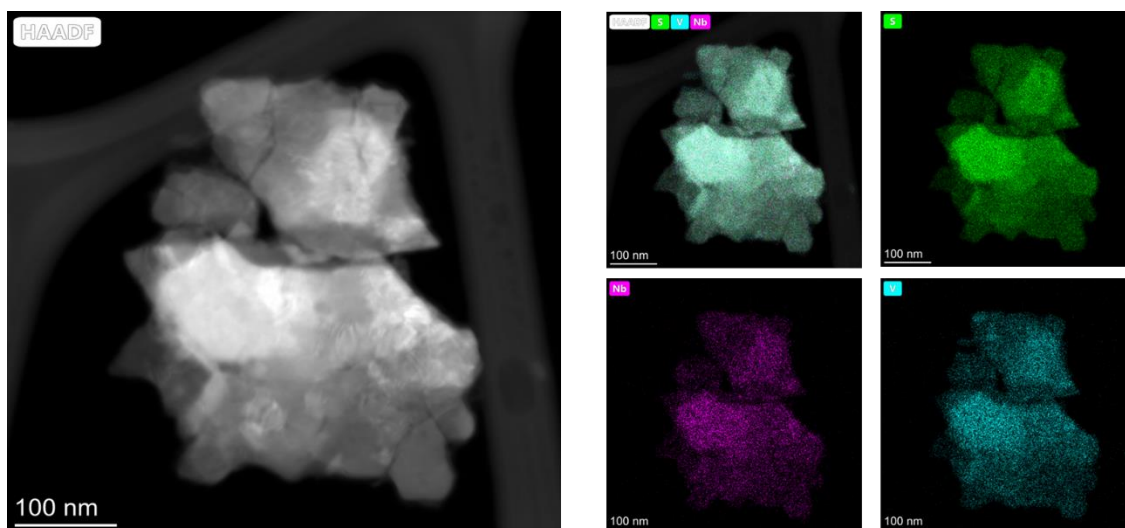

Figure S6 Elemental mapping using HAADF-STEM of  $Nb_3VS_6$ .

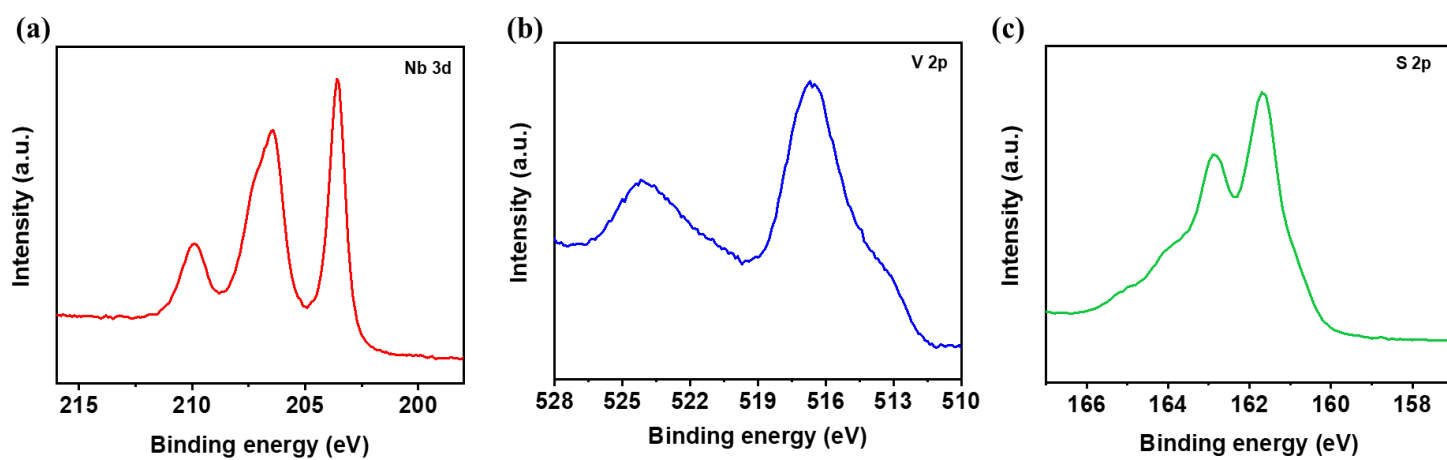

Figure S7 XPS spectra of  $Nb_3VS_6$  (a) Nb 3d, (b) V 3p and (c) S 2p.

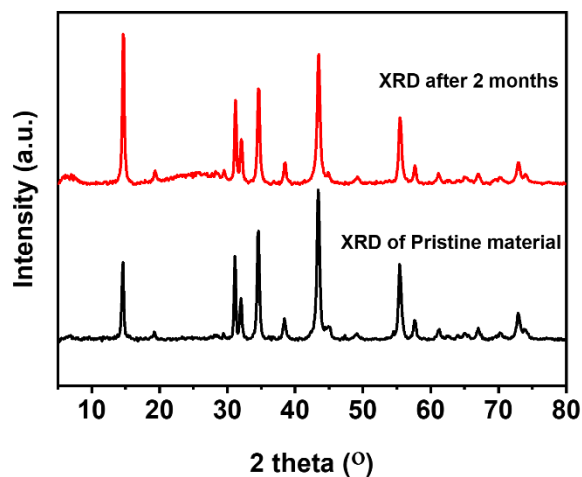

Figure S8 XRD pattern of  $Nb_3VS_6$  kept stored under ambient conditions before and after a span of two months.

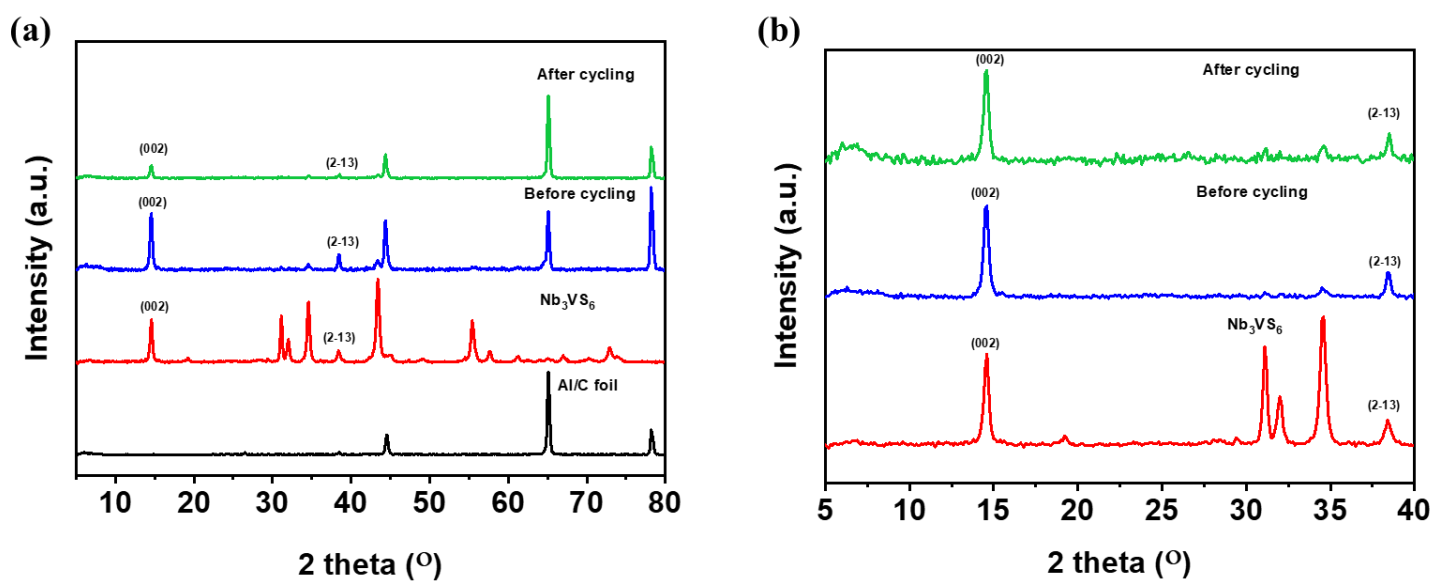

Figure S9 (a) Post-mortem XRD analysis for  $Nb_3VS_6$  before cycling and after 5 cycles, (b) Inset showing comparison between the bulk material with the pre and post cycling XRD pattern showing no considerable changes before and after cycling providing another conclusive proof about the insertion mechanism in  $Nb_3VS_6$ .



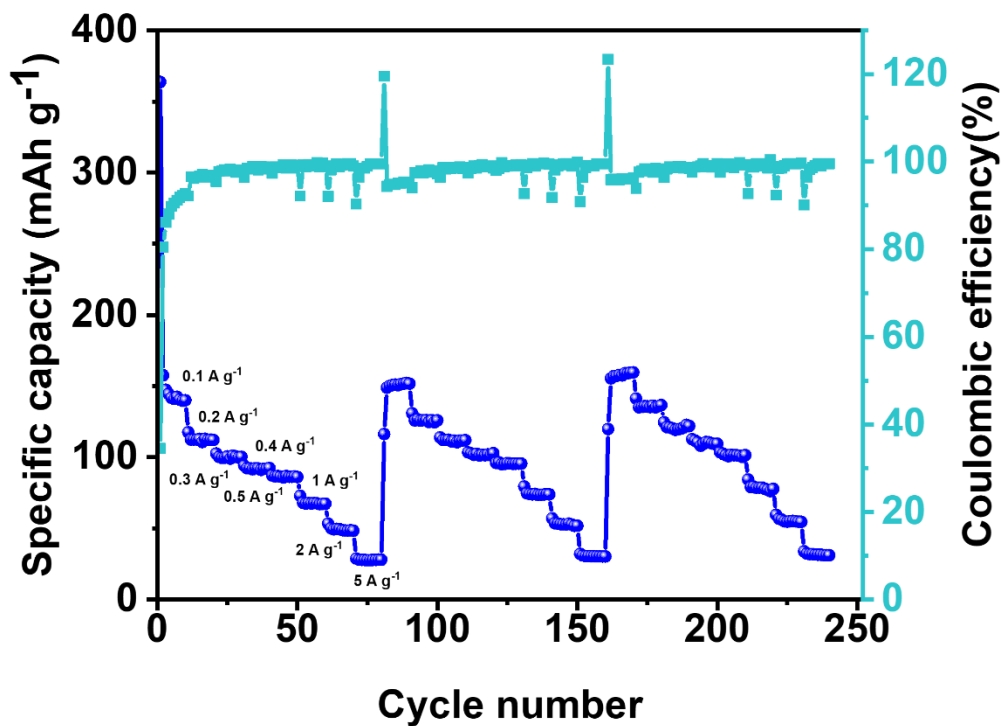

Figure S10 High-rate performance of  $Nb_3VS_6$  SIB anode.

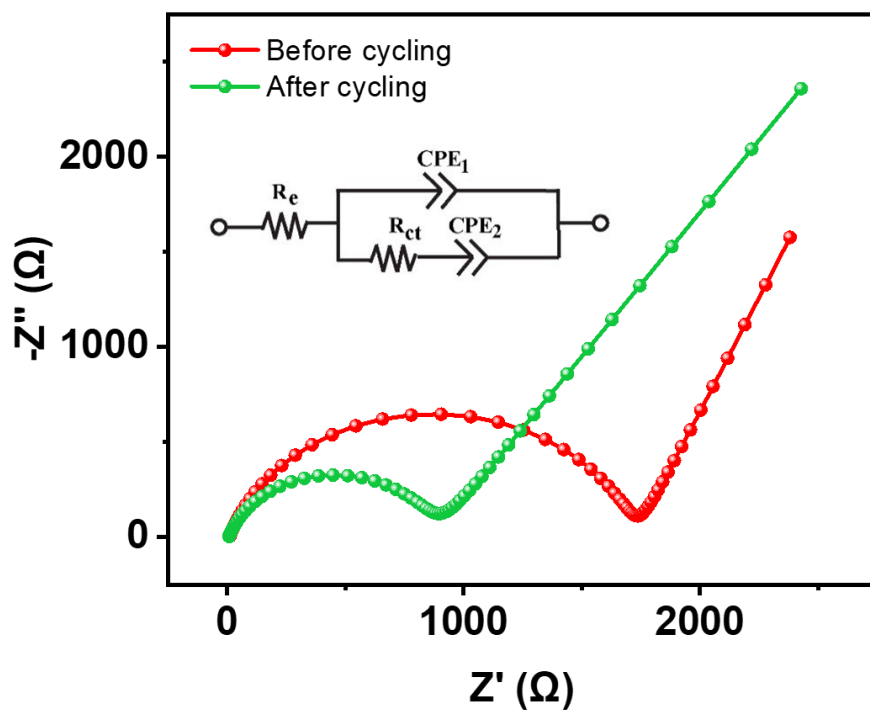

Figure S11 EIS spectra before and after CV cycles at  $0.1 \text{ mV s}^{-1}$ .

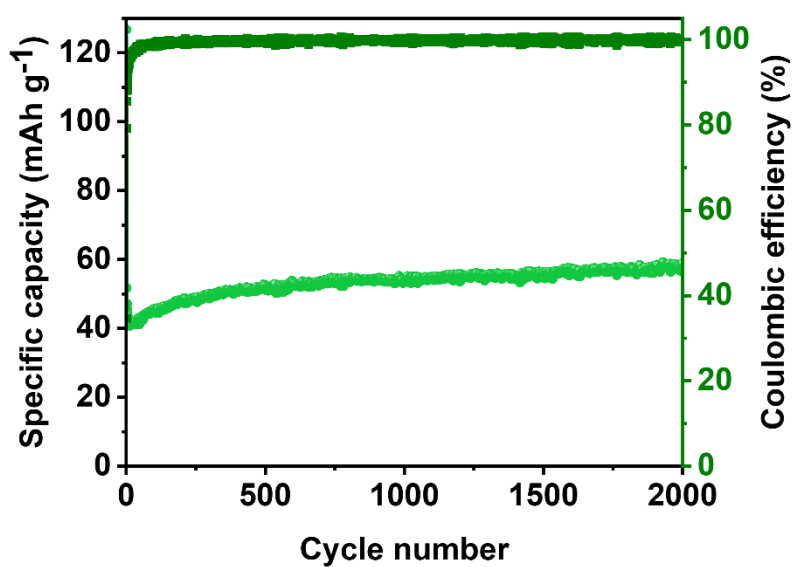

Figure S12 Cycling stability at  $2 \text{ A g}^{-1}$  for 2000 cycles.

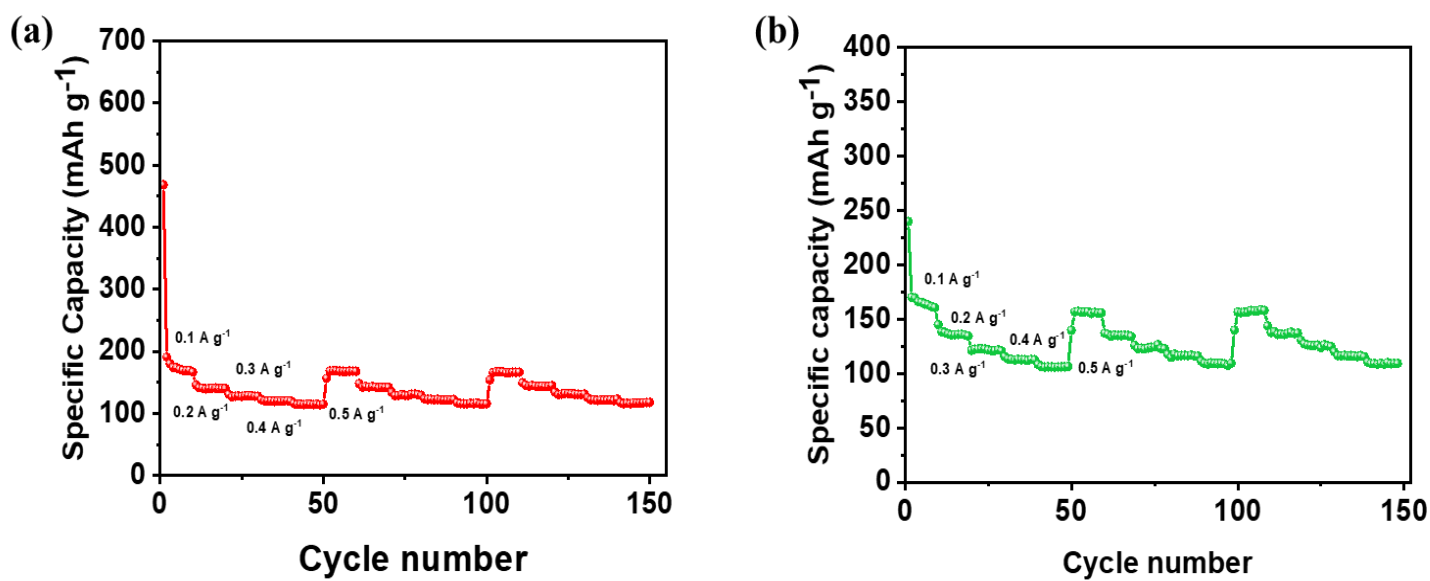

Fig. S13 Rate capabilities of other control samples in SIB (a) with  $\text{H}_2\text{S}$  flow rate of 25 sccm with  $950^\circ \text{C}$  for 45 minutes, (b) with  $\text{H}_2\text{S}$  flow rate of 35 sccm with  $950^\circ \text{C}$  for 30 minutes.

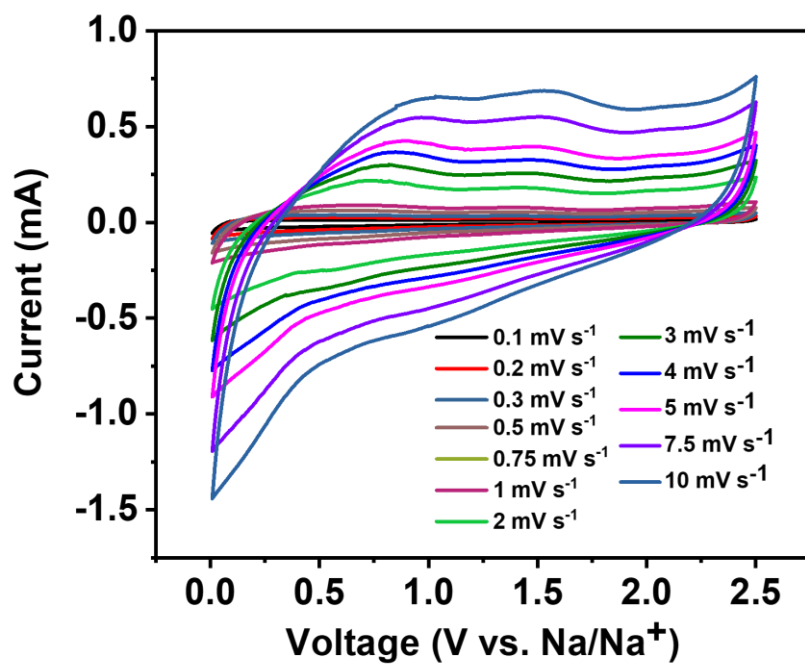

Figure S14 CV of  $\text{Nb}_3\text{VS}_6$  SIB anode at different scan rates.

Table S1 Comparison of cycling stability performance of Nb<sub>3</sub>VS<sub>6</sub> anode with literature

| S no | Anode material                                        | Capacity/ Current density                         | No. of cycles | ref       |
|------|-------------------------------------------------------|---------------------------------------------------|---------------|-----------|
| 1    | T-Nb <sub>2</sub> O <sub>5</sub> @NbS <sub>2</sub> @C | 102 mAhg <sup>-1</sup> / 2 Ag <sup>-1</sup>       | 500 cycles    | 5         |
| 2    | SnS/SnSe <sub>2</sub>                                 | 580 mAhg <sup>-1</sup> / 0.1 A g <sup>-1</sup>    | 100 cycles    | 6         |
| 3    | N-MoS <sub>2</sub> /C@SiOC                            | 486.8 mAhg <sup>-1</sup> / 0.1 A g <sup>-1</sup>  | 200 cycles    | 7         |
| 4    | SnS <sub>2</sub> /rGO/SnS <sub>2</sub>                | 1133 mAhg <sup>-1</sup> / 0.1 A g <sup>-1</sup>   | 100 cycles    | 8         |
| 5    | F-CoSnS                                               | 450 mAh g <sup>-1</sup> / 0.05 A g <sup>-1</sup>  | 200 cycles    | 9         |
| 6    | CuV <sub>2</sub> S <sub>4</sub>                       | 580 mAh g <sup>-1</sup> / 0.7 A g <sup>-1</sup>   | 300 cycles    | 10        |
| 7    | Nb <sub>3</sub> VS <sub>6</sub>                       | 101.10 mAhg <sup>-1</sup> / 0.5 A g <sup>-1</sup> | 2500 cycles   | This work |

## References

- 1 P. Chithaiah, D. C. Binwal and C. N. R. Rao, *Eur. J. Inorg. Chem*, 2022, **2022**, e202101086.
- 2 R. Singh, P. Chithaiah and C. N. R. Rao, *Nanotechnology*, 2023, **34**, 145705.
- 3 N. Krins, J. D. Bass, D. Grosso, C. Henrist, R. Delaigle, E. M. Gaigneaux, R. Cloots, B. Vertruyen and C. Sanchez, *Chem Mater*, 2011, **23**, 4124–4131.
- 4 M. W. Louie and A. T. Bell, *J Am Chem Soc*, 2013, **135**, 12329–12337.
- 5 C. Pan, J. Kang, Q. Xie, Q. Li, W. Yang, H. Zou and S. Chen, *ACS Appl Energy Mater*, 2021, **4**, 12365–12373.
- 6 T. Wang, D. Legut, Y. Fan, J. Qin, X. Li and Q. Zhang, *Nano Lett*, 2020, **20**, 6199–6205.
- 7 H. Lim, S. Yu, W. Choi and S. O. Kim, *ACS Nano*, 2021, **15**, 7409–7420.
- 8 Y. Jiang, D. Song, J. Wu, Z. Wang, S. Huang, Y. Xu, Z. Chen, B. Zhao and J. Zhang, *ACS Nano*, 2019, **13**, 9100–9111.
- 9 S. Dou, J. Xu, H. M. K. Sari, H. H. Wu, J. Hu, Y. Zhang, L. Fan, D. Xiong, W. Zhou, Y. Chen and X. Li, *ACS Appl. Mater. Interfaces*, 2020, **12**, 41546–41556.
- 10 M. Kregel, A. L. Hansen, M. Kaus, S. Indris, N. Wolff, L. Kienle, D. Westfal and W. Bensch, *ACS Appl. Mater. Interfaces*, 2017, **9**, 21282–21291.
